# Supplementary material
Source: PubMed Central journal article supplement (PMC2650303)
Supplement: 0809800106_0809800106SI.pdf [file 0809800106_0809800106SI.pdf]

# Supporting Information

Horn et al. 10.1073/pnas.0809800106

## SI Materials and Methods

**Surface Plasmon Resonance (SPR) Experiments.** Before use, the chip surface was prepared by flowing HBS buffer [10 mM Hepes, 150 mM NaCl, 3 mM EDTA, 0.005% Tween 20 (pH 7.4)] at 100  $\mu\text{L}/\text{min}$  and performing three injections of 20  $\mu\text{L}$  of hydrochloric acid solution (N/10), sodium hydroxide solution (N/10), and 0.5% (wt/vol) SDS. Receptor coupling involved first activating the surface by flowing 25  $\mu\text{L}$  of NHS:EDC (75 mg/mL:11.5 mg/mL) at a flow rate of 5  $\mu\text{L}/\text{min}$ . Next, 20  $\mu\text{L}$  of 18 mg/mL 2-(2-pyridinyldithio)ethaneamine hydrochloride (PDEA) was injected over all flow cells. Human growth hormone receptor (hGHR) (2–4  $\mu\text{L}$  of 1  $\mu\text{M}$ ) was diluted to 100  $\mu\text{L}$  of total volume of 10 mM sodium acetate so that the final receptor concentration was 20–40 nM (pH 4.5); 25–50  $\mu\text{L}$  was then injected over sample flow cells (FC2, 3, and 4; leaving FC1 as a reference cell). The receptor was always coupled so that a maximum resonance units (RU) upon hormone binding reached a maximum value between 20 and 60 RU. After receptor coupling, uncoupled functional groups were blocked with 30  $\mu\text{L}$  of 50 mM reduced glutathione in 50 mM sodium acetate, 1 M NaCl (pH 4.5). Human prolactin receptor (hPRLR) was coupled to the surface with an engineered cysteine (C184A/T207C) by using a procedure outlined in ref. 1, which includes both a glutathione and ethanolamine blocking step to eliminate unreacted SH and NH groups, respectively.

All experiments were carried out at a flow rate of 50  $\mu\text{L}/\text{min}$ . Experiments typically included duplicate injections of  $\approx 6$  different concentrations of hormone (using 2-fold dilutions starting from 75 to 200 nM) injected over the three sample cells (FC2, 3, and 4 and one reference FC1). Blank (buffer) injections were dispersed between every 3–4 hormone injections to optimize blank subtractions. The chip surface was regenerated with 5- $\mu\text{L}$  injections of 4.5 M  $\text{MgCl}_2$ . Data were subjected to baseline/blank injection normalization by using the program SCRUBBER (BioLogic Software). Data were then fit globally by using the 1:1 Langmuir model using the program CLAMP (2). Transition state (TS) thermodynamics parameters (theory described below) were investigated by determining the temperature dependence of the association and dissociation rates over a range of 15–40  $^{\circ}\text{C}$ . Urea dependence studies (examining association and dissociation binding kinetics) were investigated over a range of 0–0.8 M urea.

**TS Thermodynamics.** TS theory describes the activation free energy, or TS free energy of association (or dissociation), with the following relationship:

$$\Delta G_{\text{on}}^{\ddagger} = -RT \ln\left(\frac{k_{\text{on}}h}{k_{\text{B}}T}\right) \quad [\text{s1}]$$

where  $\Delta G_{\text{on}}^{\ddagger}$  is the TS free energy for association (or dissociation),  $R$  is the gas constant,  $T$  is the temperature (on Kelvin scale),  $k_{\text{on}}$  is the association rate,  $h$  is the Plank constant ( $6.625 \times 10^{-34}$  Js), and  $k_{\text{B}}$  is the Boltzmann constant ( $1.3805 \times 10^{-23}$  J/K).  $\Delta G_{\text{on}}^{\ddagger}$  possesses both enthalpic ( $\Delta H_{\text{on}}^{\ddagger}$ ) and entropic components ( $\Delta S_{\text{on}}^{\ddagger}$ ).

$$\Delta G_{\text{on}}^{\ddagger} = \Delta H_{\text{on}}^{\ddagger} - T\Delta S_{\text{on}}^{\ddagger} \quad [\text{s2}]$$

The temperature dependence of  $\Delta H_{\text{on}}^{\ddagger}$  and  $\Delta S_{\text{on}}^{\ddagger}$  are described by the  $\Delta C_{\text{p,on}}^{\ddagger}$ :

$$\begin{aligned} \Delta H_{\text{on}}^{\ddagger} &= \Delta H_{\text{on,ref}}^{\ddagger} + \Delta C_{\text{p}}^{\ddagger}(T - T_{\text{ref}}) \\ \Delta S_{\text{on}}^{\ddagger} &= \Delta S_{\text{on,ref}}^{\ddagger} + \Delta C_{\text{on}}^{\ddagger} \ln(T/T_{\text{ref}}) \end{aligned} \quad [\text{s3}]$$

where  $T_{\text{ref}}$  is the reference temperature (25  $^{\circ}\text{C}$  for the work presented here) and  $\Delta H_{\text{on,ref}}^{\ddagger}$  and  $\Delta S_{\text{on,ref}}^{\ddagger}$  are the TS enthalpy and entropy at the reference temperature, respectively. The above equations were combined to the following equation:

$$\begin{aligned} \ln\left(\frac{k_{\text{on}}}{T}\right) &= \frac{\Delta S_{\text{on}}^{\ddagger} - \Delta C_{\text{p,on}}^{\ddagger}}{R} + \ln\left(\frac{h}{k_{\text{B}}}\right) \\ &+ \frac{\Delta C_{\text{p,on}}^{\ddagger} - \Delta H_{\text{on}}^{\ddagger}/T_{\text{ref}}}{R} \left(\frac{T_{\text{ref}}}{T}\right) \\ &- \frac{\Delta C_{\text{p,on}}^{\ddagger}}{R} \ln\left(\frac{T_{\text{ref}}}{T}\right). \end{aligned} \quad [\text{s4}]$$

Similarly, the following includes the dissociation parameter:

$$\begin{aligned} \ln\left(\frac{k_{\text{off}}}{T}\right) &= \frac{\Delta S - \Delta C_{\text{p,off}}^{\ddagger}}{R} + \ln\left(\frac{h}{k_{\text{B}}}\right) \\ &+ \frac{\Delta C_{\text{p,on}}^{\ddagger} - \Delta H_{\text{off}}^{\ddagger}/T_{\text{ref}}}{R} \left(\frac{T_{\text{ref}}}{T}\right) \\ &- \frac{\Delta C_{\text{p,off}}^{\ddagger}}{R} \ln\left(\frac{T_{\text{ref}}}{T}\right). \end{aligned} \quad [\text{s5}]$$

These two relationships were used in fitting the temperature-dependent SPR  $k_{\text{on}}$  and  $k_{\text{off}}$  values, respectively. A temperature range of 15–40  $^{\circ}\text{C}$  was examined experimentally. The program KaleidaGraph was used in fitting the data, when expressed as  $\ln k/T$  as a function of  $1/T$ , to determine the TS thermodynamics parameters.

For both hGHv and AS1, the slow rate of dissociation at lower temperatures prevented obtaining accurately the dissociation thermodynamics (including  $\Delta H^{\ddagger}$ ,  $\Delta S^{\ddagger}$ , and  $\Delta C_{\text{p}}^{\ddagger}$ ). However, comparison of dissociation thermodynamics (for both WT hGH and AS2) calculated from equilibrium and association thermodynamic values compared well with dissociation thermodynamics determined experimentally, suggesting that dissociation thermodynamics for hGHv and AS1 could be reliably calculated using the existing data. Therefore, dissociation thermodynamics were determined by using the association thermodynamics (determined here) and the equilibrium thermodynamics [determined previously (3)] by using the following relationships.

$$\begin{aligned} \Delta H_{\text{eq}}^{\circ} &= \Delta H_{\text{on}}^{\ddagger} - \Delta H_{\text{off}}^{\ddagger} \\ \Delta S_{\text{eq}}^{\circ} &= \Delta S_{\text{off}}^{\ddagger} - \Delta S_{\text{on}}^{\ddagger} \\ \Delta C_{\text{p,eq}}^{\circ} &= \Delta C_{\text{p,on}}^{\ddagger} - \Delta C_{\text{p,off}}^{\ddagger}. \end{aligned} \quad [\text{s6}]$$

**Error Analysis.** Errors are presented as  $\pm 1$  SD. When necessary, such as calculation of  $\Delta S_{\text{assoc}}^{\ddagger}$  and  $\Delta C_{\text{p,off}}^{\ddagger}$ , error was propagated according to the following (4):

$$(df)^2 = \left[ \left( \frac{\partial f}{\partial x} \right)^2 (dx)^2 + \left( \frac{\partial f}{\partial y} \right)^2 (dy)^2 + \dots \right]. \quad [\text{s7}]$$

**Mutational Analysis of Binding Kinetics.** Single alanine mutants of both hGH and hGHR interface were explored (5, 6). These include alanine point mutations at hGH residues M14, H18, H21, Q22, F25, D26, Q29, Y42, L45, Q46, P48, S51, E56, P61, S62, N63, R64, E65, Q68, Y164, R167, K168, D171, K172, E174,

T175, F176, R178, I179, R183, and E186 and hGHR residues: R43, E44, R70, W76, S98, S102, I103, W104, I105, P106, E120,

K121, D126, E127, D164, I165, Q166, W169, V171, Q216, R217, N218, and S219.

1. Walsh ST, Kossiakoff AA (2006) Crystal structure and site 1 binding energetics of human placental lactogen. *J Mol Biol* 358:773–784.
2. Myszkowski DG, Morton TA (1998) CLAMP: A biosensor kinetic data analysis program. *Trends Biochem Sci* 23:149–150.
3. Kouadio JL, Horn JR, Pal G, Kossiakoff AA (2005) Shotgun alanine scanning shows that growth hormone can bind productively to its receptor through a drastically minimized interface. *J Biol Chem* 280:25524–25532.
4. Bevington PR, Robinson DK (1992) *Data Reduction and Error Analysis for the Physical Sciences* (McGraw-Hill, New York) 2nd Ed.
5. Bernat B, Sun M, Dwyer M, Feldkamp M, Kossiakoff AA (2004) Dissecting the binding energy epitope of a high-affinity variant of human growth hormone: cooperative and additive effects from combining mutations from independently selected phage display mutagenesis libraries. *Biochemistry* 43:6076–6084.
6. Cunningham BC, Wells JA (1993) Comparison of a structural and a functional epitope. *J Mol Biol* 234:554–563.

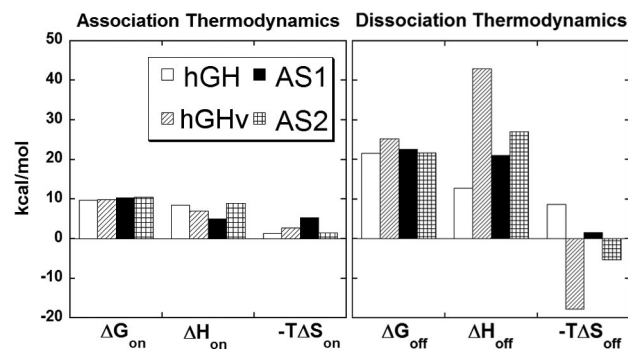

**Fig. S1.** TS thermodynamics for hormone–receptor binding, which includes wild-type hormone, the phage-optimized hGHv, and two alanine-shaved hormones, AS1 and AS2. Both association (*Left*) and dissociation (*Right*) TS thermodynamics are presented.

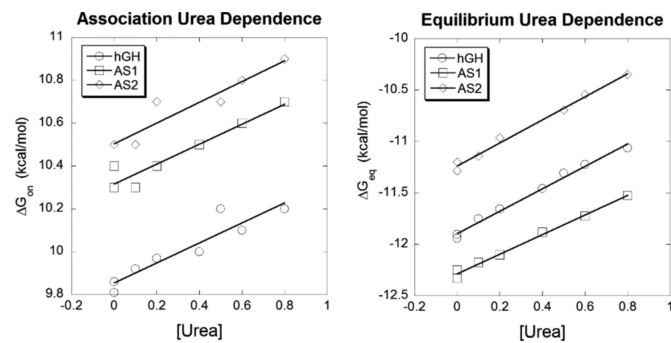

**Fig. S2.** Urea dependence of the binding association rate (*Left*) and equilibrium constant (*Right*) for hGH and the two alanine-shaved variants.

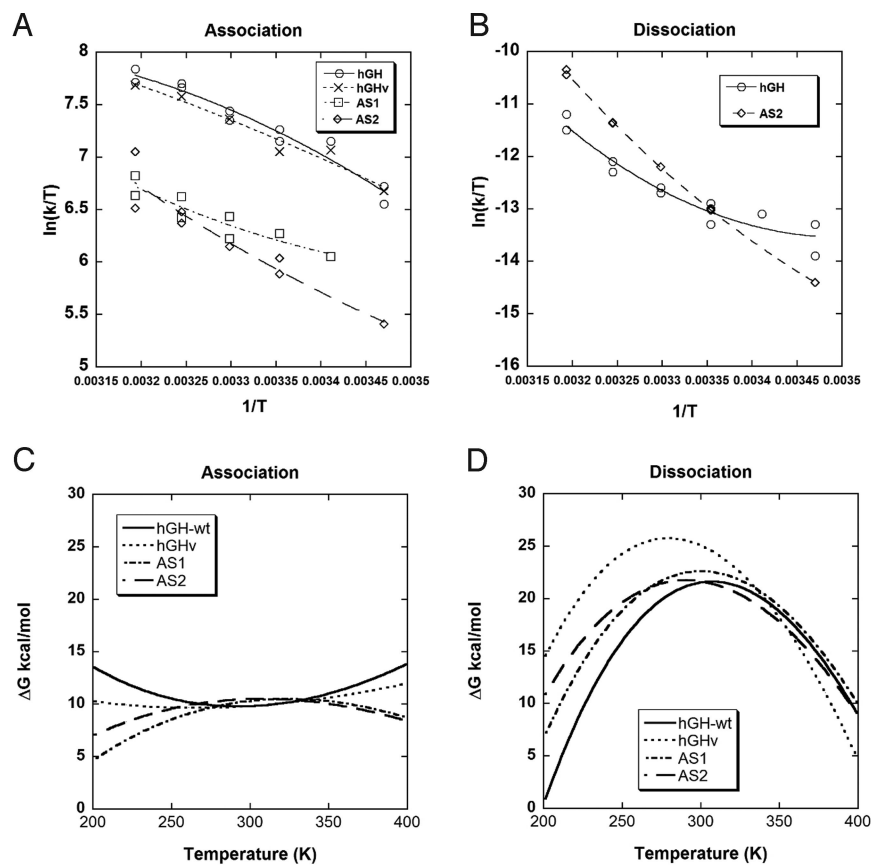

**Fig. S3.** Temperature dependence of growth hormone–receptor association and dissociation. (A and B) Raw data plots of  $\ln k/T$  vs.  $1/T$  for association (A) and dissociation (B). Temperature ( $T$ ) units are in the Kelvin scale. (C and D) Extrapolated free energy barriers are displayed for association (C) and dissociation (D) as a function of temperature for the different hGH variants. The stability curves (C and D) are obtained from the TS association and dissociation thermodynamic values (i.e.,  $\Delta H^\ddagger$ ,  $\Delta S^\ddagger$ , and  $\Delta C_p^\ddagger$ ) as described in *SI Materials and Methods*. Data are extrapolated over a wide temperature range ranging from 200 to 400 K.
